# Supplementary material for: Flaky CoS2and graphene nanocomposite anode materials for sodium-ion batteries with improved performance
Source: Royal Society of Chemistry journal article supplement (doi:10.1039/c6ra12563h), 2016-01-01
Supplement: c6ra12563h1.pdf [file c6ra12563h1.pdf]

## Supporting Information

### **Flaky CoS<sub>2</sub> and graphene nanocomposite anode materials for sodium-ion batteries with improved performance**

Zhiwei Li,<sup>a,b</sup> Wenjing Feng,<sup>a,b</sup> Yaqin Lin,<sup>a,b</sup> Xin Liu<sup>a,b</sup> and Hailong Fei<sup>\*a,b</sup>

<sup>a</sup>State Key Laboratory of Photocatalysis on Energy and Environment, Fuzhou University, Fuzhou, Fujian 350002, China.

<sup>b</sup>Institute of Advanced Energy Materials, Fuzhou University, Fuzhou, Fujian 350002, China.

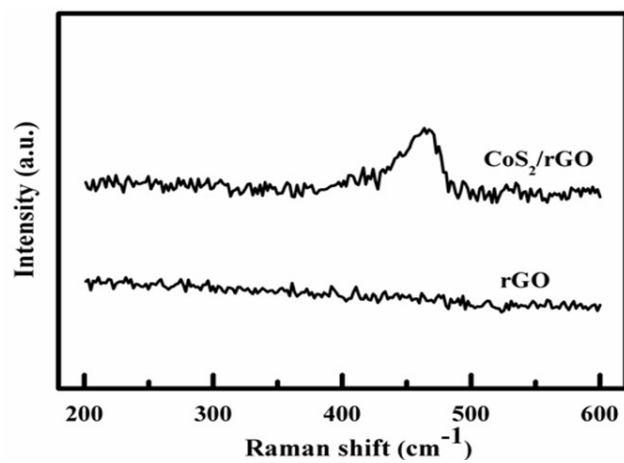

Fig. S1 Raman spectra of CoS<sub>2</sub>/rGO and rGO in the range from 200 to 600 cm<sup>-1</sup>.

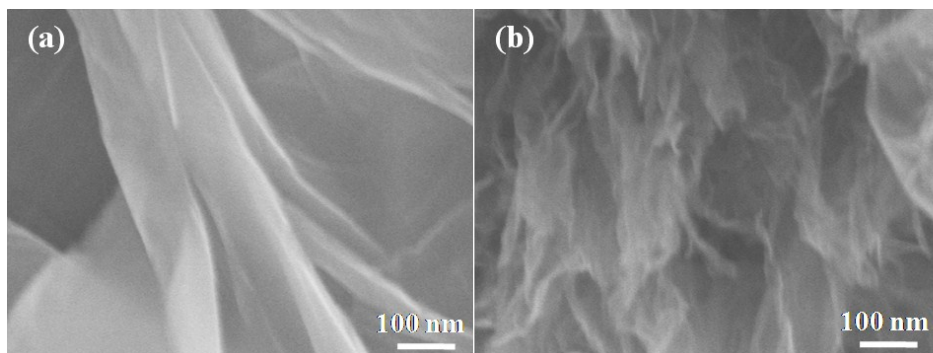

Fig. S2 SEM images of (a) GO and (b) rGO.

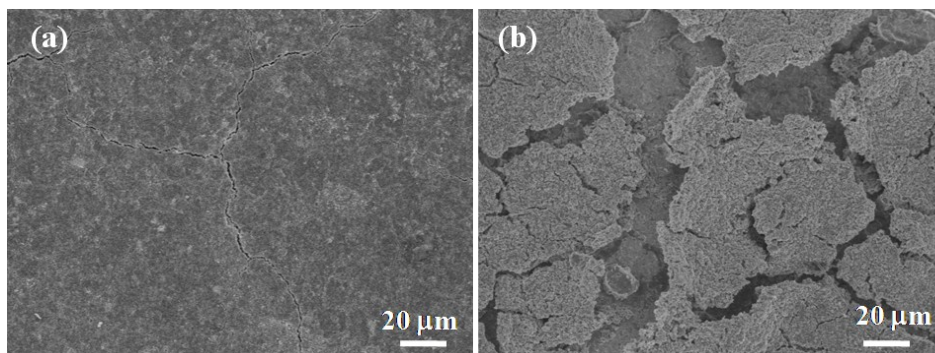

Fig. S3 SEM images of bare CoS<sub>2</sub> electrode (a) before and (b) after cycling 10 cycles at a current density of 0.5 A g<sup>-1</sup>.

Table S1 Comparison of cycle performance for SIBs with previous work

|                                                      | Current density<br>(mA g <sup>-1</sup> ) | Initial discharge capacity<br>(mA h g <sup>-1</sup> ) | Reversible capacity<br>(mA h g <sup>-1</sup> ) | Cycles<br>(n) |
|------------------------------------------------------|------------------------------------------|-------------------------------------------------------|------------------------------------------------|---------------|
| CoS <sub>2</sub> /MWCNT <sup>34</sup>                | 100                                      | 826                                                   | 411                                            | 100           |
| CoS@rGO <sup>17</sup>                                | 1000                                     | 581                                                   | 420                                            | 1000          |
| Co <sub>3</sub> S <sub>4</sub> -PNS/GS <sup>20</sup> | 500                                      | 847.3                                                 | 329                                            | 50            |
| H- CoS <sub>2</sub> <sup>25</sup>                    | 1000                                     | 726                                                   | 690                                            | 100           |
| cs-Co <sub>x</sub> S <sub>y</sub> /DPC <sup>18</sup> | 500                                      | 600                                                   | 300                                            | 50            |
| Co <sub>9</sub> S <sub>8</sub> -carbon <sup>19</sup> | 500                                      | 689                                                   | 404                                            | 50            |
| CoS/rGO <sup>21</sup>                                | 100                                      | 567.3                                                 | 230.8                                          | 100           |
| <b>Our work</b>                                      | <b>1000</b>                              | <b>661.2</b>                                          | <b>192</b>                                     | <b>1000</b>   |

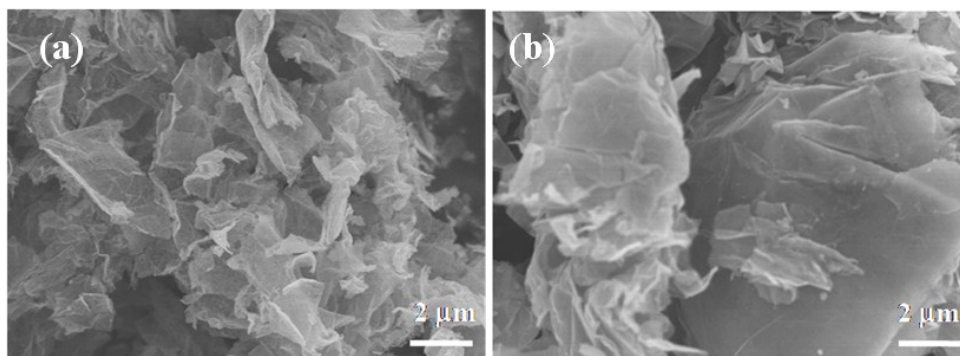

Fig. S4 SEM image of the CoS<sub>2</sub>/rGO composites prepared (a) with sonicated GO and (b) with unsonicated GO.

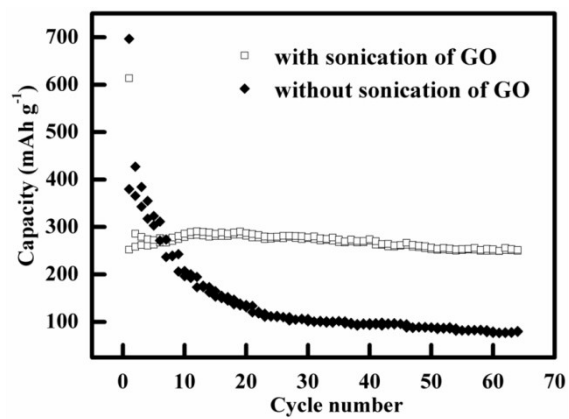

Fig. S5 Cycling performances of the CoS<sub>2</sub>/rGO composites prepared with sonication of GO and without sonication of GO at a current density of 0.5 A g<sup>-1</sup>.
